# Supplementary material
Source: Springer Nature journal article supplement (https://www.springermedizin.de/resource/supplementary/13054_2011_599_MOESM1_ESM.pdf/9708430)

### Product-Limit Survival Estimates

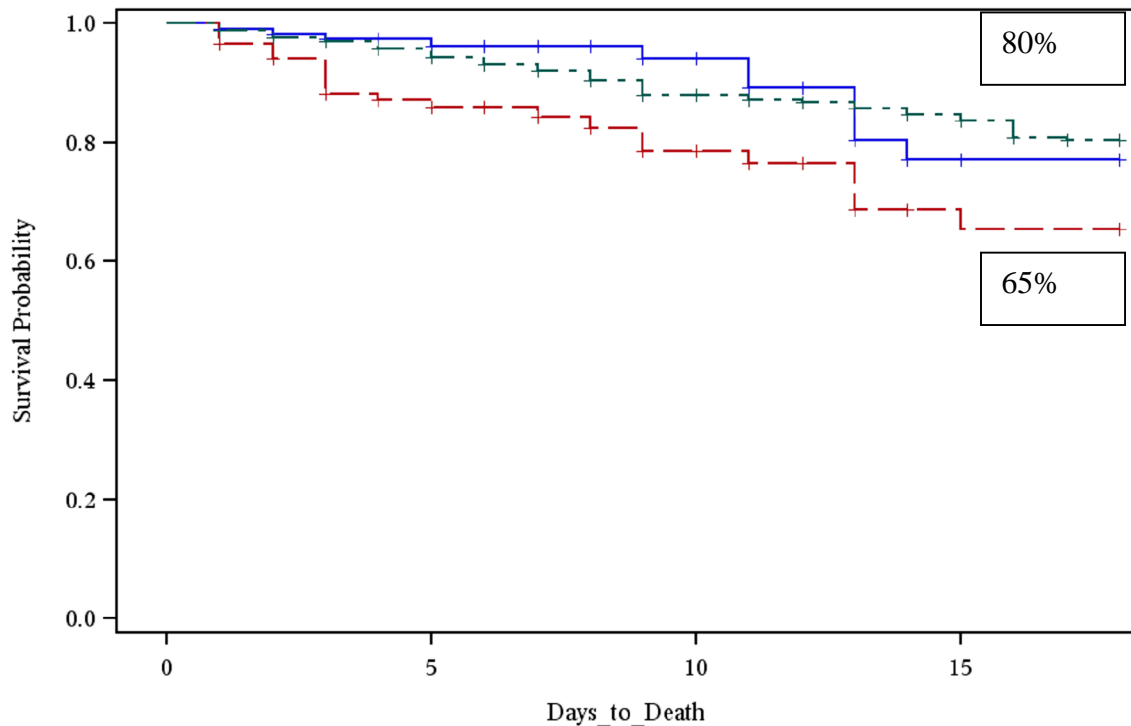

— Ever\_High=0 Back\_Down=0    - - - Ever\_High=1 Back\_Down=0  
- - - Ever\_High=1 Back\_Down=1

Supplement: MOESM1 [file 9708430]
